# Supplementary material for: A near-infrared Nile red fluorescent probe for the discrimination of biothiols by dual-channel response and its bioimaging applications in living cells and animals
Source: Royal Society of Chemistry journal article supplement (doi:10.1039/c9an00280d), 2019-01-01
Supplement: c9an00280d1.pdf [file c9an00280d1.pdf]

Supporting information for

## **A near-infrared Nile Red fluorescence probe for discrimination of biothiols by dual-channel response and its bioimaging applications in living cells and animals**

Jin-Shuai Lan,<sup>a†</sup> Rui-Feng Zeng,<sup>b†</sup> Yun Liu,<sup>a</sup> Yan-Wei Xiang,<sup>c</sup> Xiao-yi Jiang,<sup>b</sup> Li Liu,<sup>b</sup> Sai-Sai Xie,<sup>d</sup> Yue  
Ding,<sup>a\*</sup> Tong Zhang<sup>a\*</sup>

<sup>a</sup> *Experiment Center of Teaching & Learning, Shanghai University of Traditional Chinese Medicine, Shanghai, China;*

<sup>b</sup> *School of Pharmacy, Shanghai University of Traditional Chinese Medicine, Shanghai, China;*

<sup>c</sup> *Headmaster's office, Shanghai University of Traditional Chinese Medicine, Shanghai, China.*

<sup>d</sup> *National Pharmaceutical Engineering Center for Solid Preparation in Chinese Herbal Medicine, Jiangxi University of Traditional Chinese Medicine, Nanchang 330006, China*

\*Correspondence: zhangtongshutcm@hotmail.com (T.Z.); dingyue-

2001@hotmail.com (Y.D.);

Tel.: +86-021-51322318 (T.Z.)

† These authors contributed equally to this work.

## Figures captions

**Figure S1.** Fluorescence spectra changes of the probe NR-NBD upon addition of increasing amount of Hcy.

**Figure S2.** Fluorescence spectra changes of the probe NR-NBD upon the addition of Na<sub>2</sub>S and GSH.

**Figure S3.** The fluorescence emission intensity changes of NR-NBD in the presence of Cys under a constant irradiation within 2 hour in DMSO: PBS solution.

**Figure S4.** Effect of pH on the fluorescence intensity of the probe NR-NBD.

**Figure S5.** Fluorescence intensity of the probe NR-NBD in DMSO: PBS solution upon addition addition of Cys, Hcy, GSH, H<sub>2</sub>S and different amino acid.

**Figure S6.** HPLC chromatogram of probe in the reaction with Cys, Hcy, GSH and H<sub>2</sub>S in DMSO/PBS solution.

**Figure S7.** Mass spectrum of the crude product from the probe NR-NBD, Nile-Red, and the reaction of the probe NR-NBD with Cys, Hcy, GSH and H<sub>2</sub>S.

**Figure S8.** Fluorescence intensity of the probe NR-NBD in DMSO/PBS solution upon addition of various serum samples, and the working curves of probe NR-NBD to Cys in normal serum samples.

**Figure S9.** CCK8 assay of HepG2, A549 and L02 cells incubated in the presence of the probe NR-NBD at 37 °C for 24 h.

**Figure S10.** <sup>1</sup>H-NMR spectra of the probe NR-NBD in CDCl<sub>3</sub>: MeOD (20: 1, v:v).

**Figure S11.** <sup>13</sup>C-NMR spectra of the probe NR-NBD in CDCl<sub>3</sub>: MeOD (1: 3, v: v).

**Figure S12.** HRMS spectrum of probe NR-NBD in MeOH.

**Figure S13.** The fluorescence intensity of probe NR-NBD with different incubated time in living cells pretreated with Cys.

## Tables caption

**Table S1.** The comparison data with some other fluorescent probes

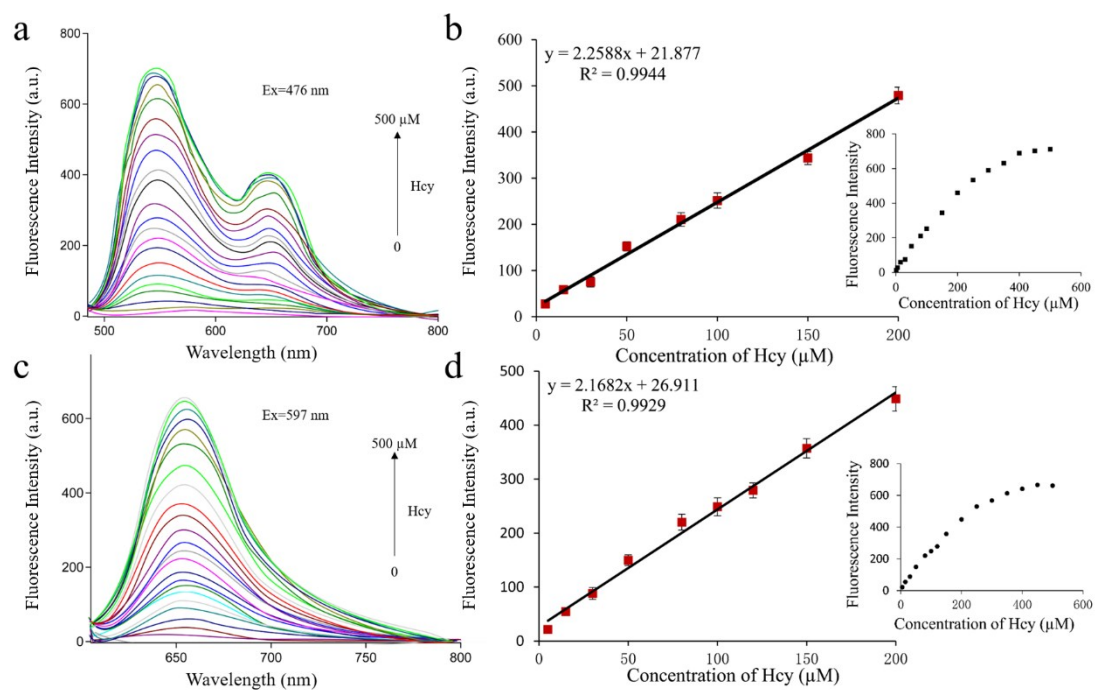

**Figure S1.** (a-d) fluorescence spectra changes of the probe NR-NBD (10 μM) upon addition of increasing amount of Hcy (0-500 μM). For (a-b)  $\lambda_{ex} = 476$  nm, for (c-d)  $\lambda_{ex} = 597$  nm. Slits: 10.0/5.0 nm.

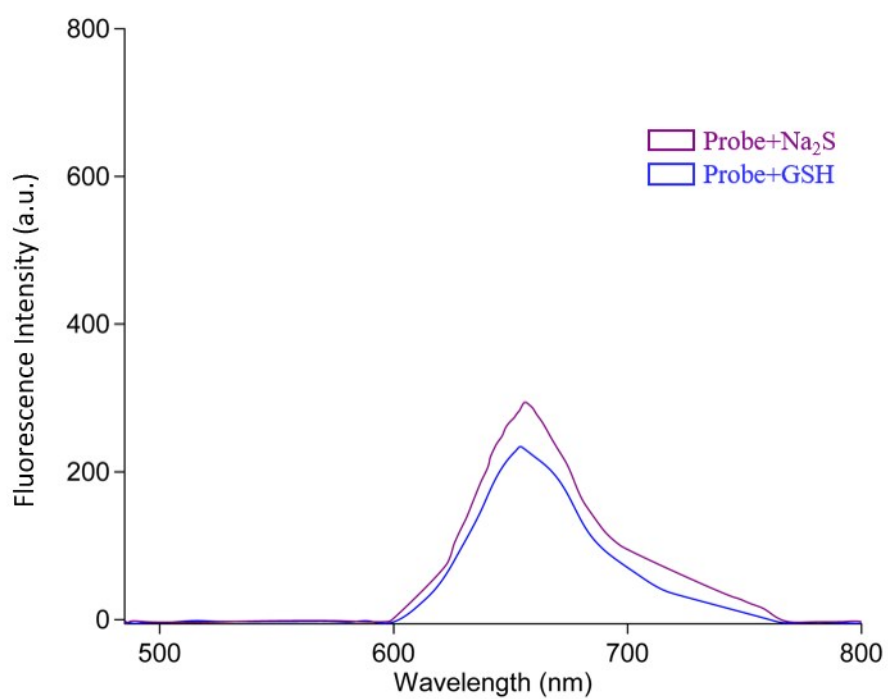

**Figure S2.** Fluorescence spectra changes of the probe NR-NBD (10 μM) upon the addition of Na<sub>2</sub>S (500 μM) and GSH (500 μM). For  $\lambda_{\text{ex}} = 476$  nm. Slits: 10.0/5.0 nm.

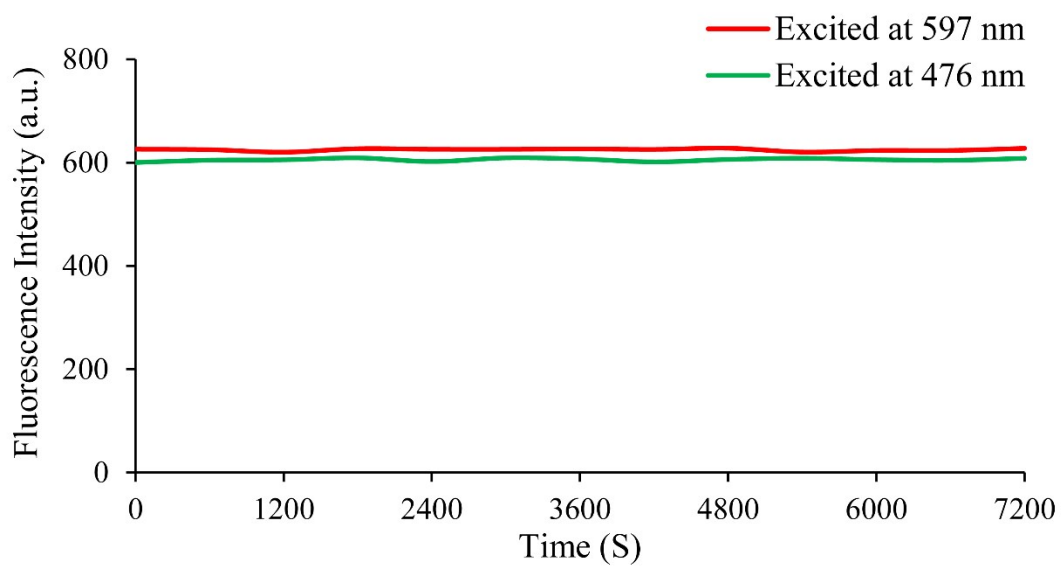

**Figure S3.** After complete reaction, the fluorescence emission intensity changes of NR-NBD (10  $\mu\text{M}$ ) in the presence of Cys (500  $\mu\text{M}$ ) under a constant irradiation within 2 hour in DMSO: PBS solution (4: 6, v/v, pH = 7.4).

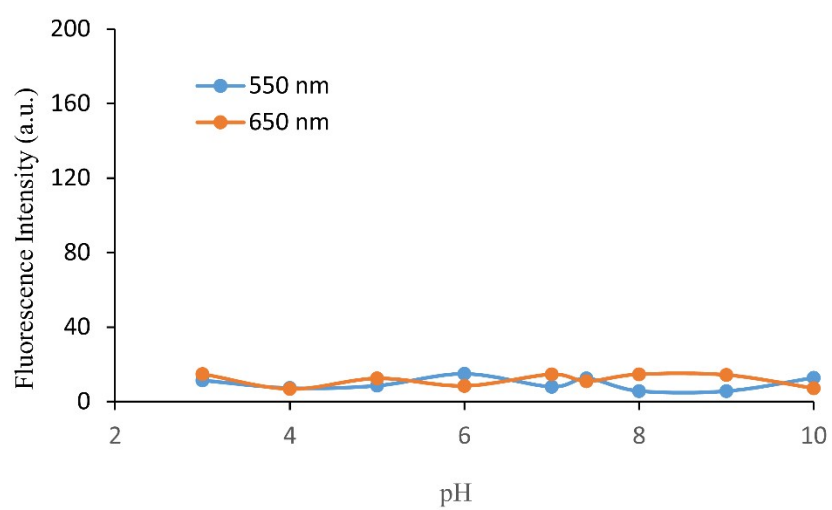

**Figure S4.** Effect of pH on the fluorescence intensity of the probe NR-NBD (10  $\mu$ M).

For  $\lambda_{\text{ex}} = 476$  nm,  $\lambda_{\text{em}} = 550$  nm;  $\lambda_{\text{ex}} = 597$  nm,  $\lambda_{\text{em}} = 650$  nm. Slits: 10.0/5.0 nm.

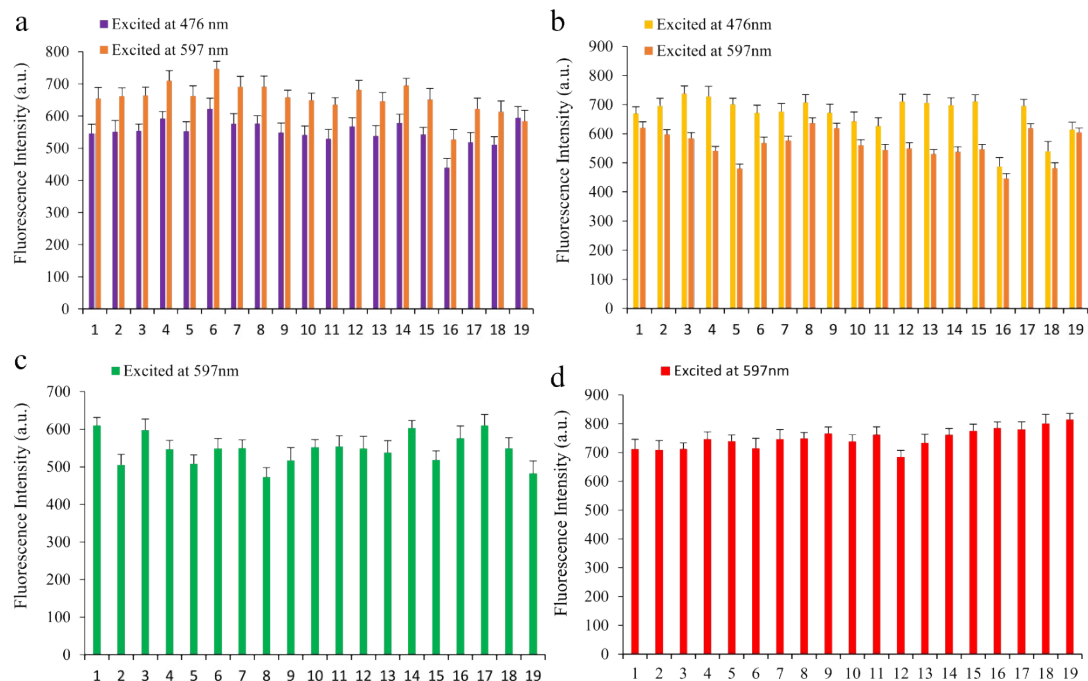

**Figure S5.** Fluorescence intensity of the probe NR-NBD (10 μM) in DMSO:PBS solution (4:6, v/v, pH=7.4) upon addition a. Cys, b. Hcy, c. GSH, d. Na<sub>2</sub>S (500 μM) and various other anions. 0. blank, 1. Tyrosine (Try), 2. Lysine (Lys), 3. Alanine (Ala), 4. Histidine (His), 5. Glycine (Gly), 6. Arginine (Arg), 7. Glutamine (Glu), 8. Cystine (Cys C), 9. Serine (Ser), 10. Methionine (Met), 11. Valine (Val), 12. Proline (Pro), 13. Threonine (Thr), 14. Isoleucine (Iso), 15. Leucine (Leu), 16. Aspartic acid (Asp), 17. Phenylalanine (Phe), 18. Glutamic acid (Glu), 19. None. For (a)  $\lambda_{\text{ex}} = 476$  nm, for (b)  $\lambda_{\text{ex}} = 597$  nm. Slits: 10.0/5.0 nm.

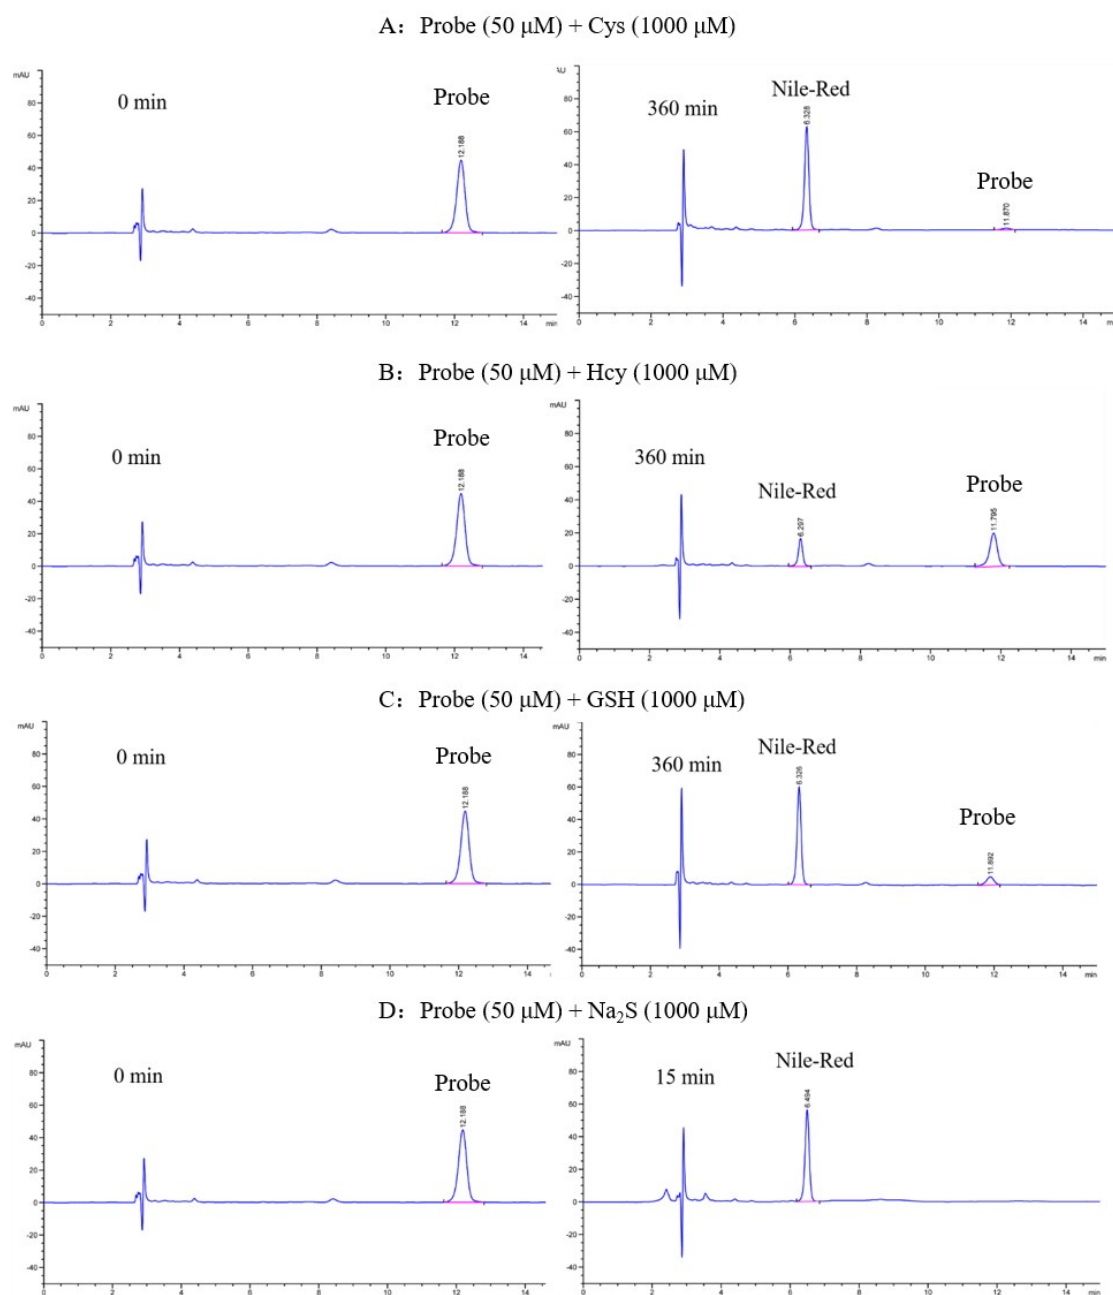

**Figure S6.** HPLC chromatogram of probe (50  $\mu$ M) in the reaction with biothiols (20 equiv.) in DMSO/PBS solution (4: 6, v/v, pH = 7.4).

HPLC method: An HPLC system (Agilent Technologies 1260-series, Agilent, USA), with a quaternary pump and a UV-DAD detector equipped with a C18 column (250 mm  $\times$  4.6 mm, internal diameter 5  $\mu$ m, Zorbax Eclipse Plus, Agilent, USA), was used. Chromatography was performed with H<sub>2</sub>O:MeOH-15:85 and the flow rate of the mobile phase was 1.0 ml/min. 10  $\mu$ l of the sample was injected. The column was



purged with the mobile phase for 10 min, followed by equilibration for 20 min, and then 20 min were required for sample analysis at 25 °C. Spectral data were collected at detection wavelengths of 254 nm.

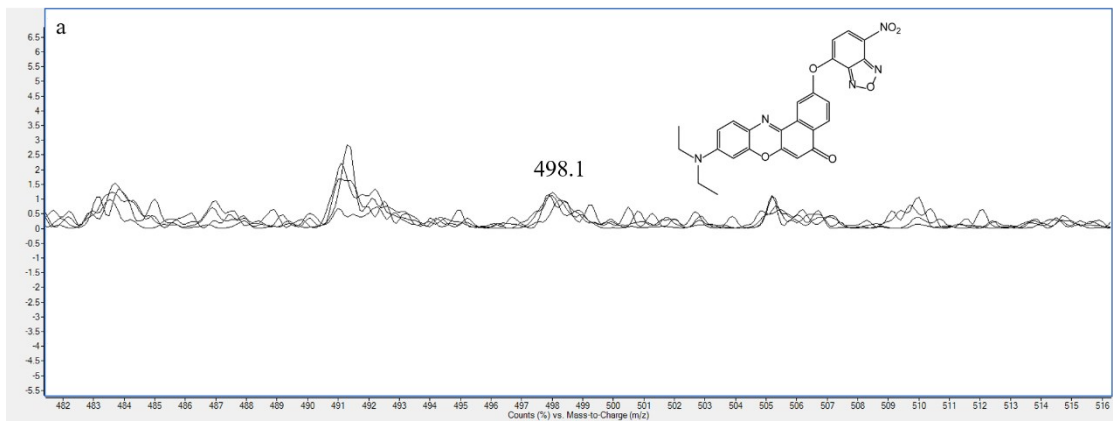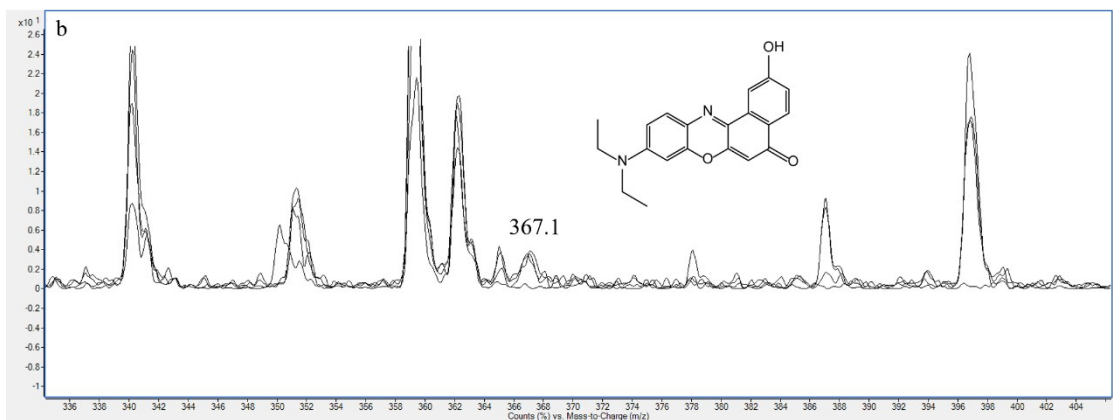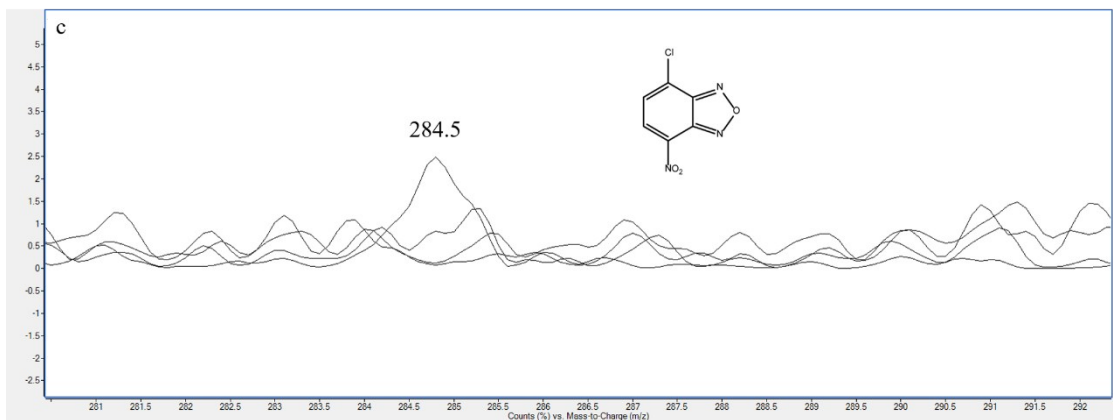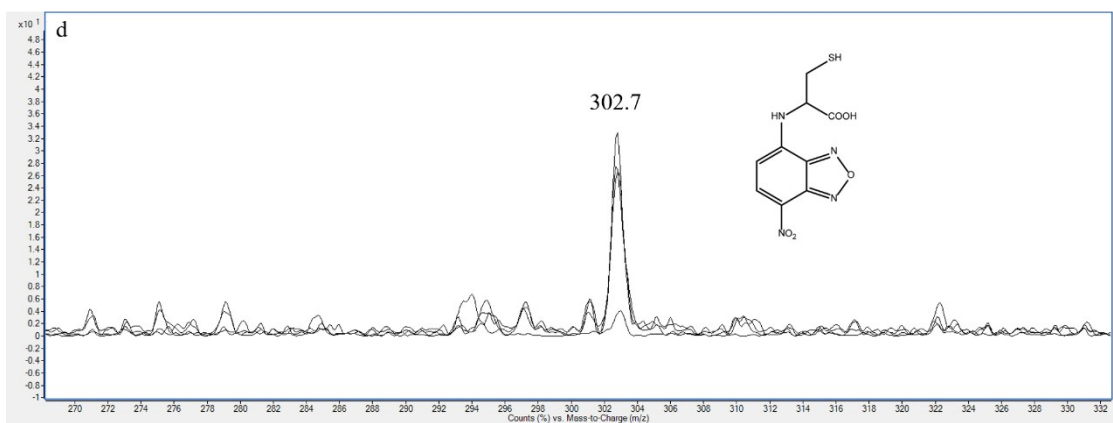

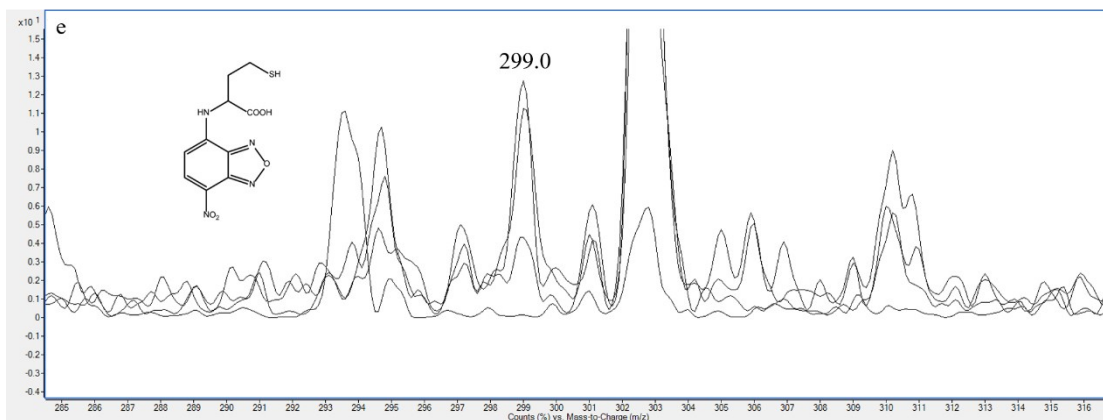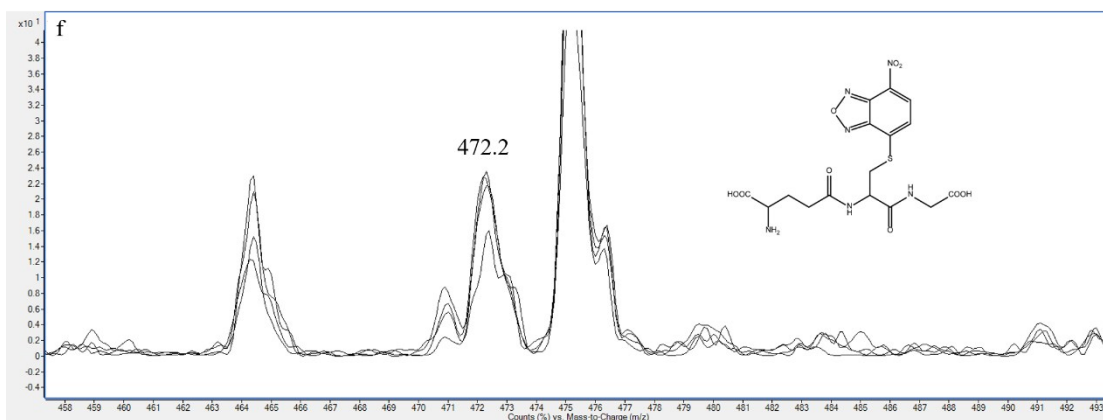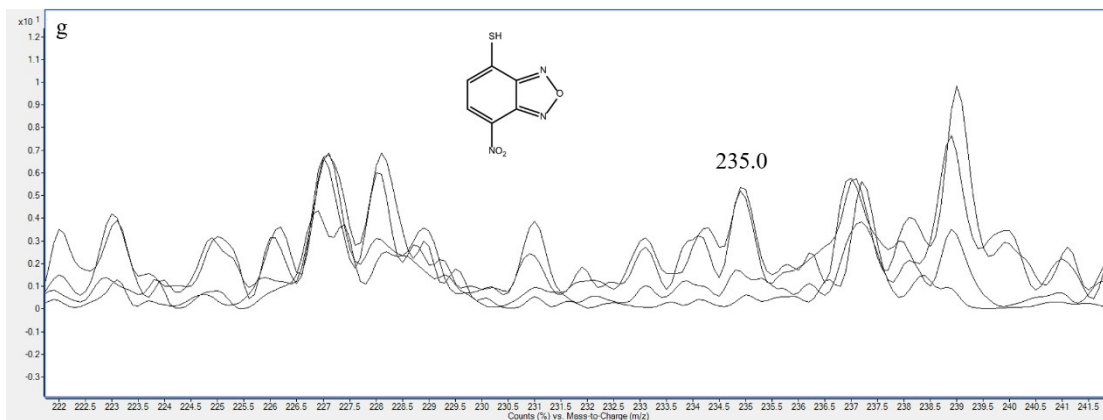

**Figure S7.** Mass spectrum of the crude product from (a) the probe NR-NBD, (b) Nile-Red, (c) NBD and the reaction of the probe NR-NBD (d) with Cys, (e) with Hcy, (f) with GSH, (g) with  $\text{H}_2\text{S}$ .

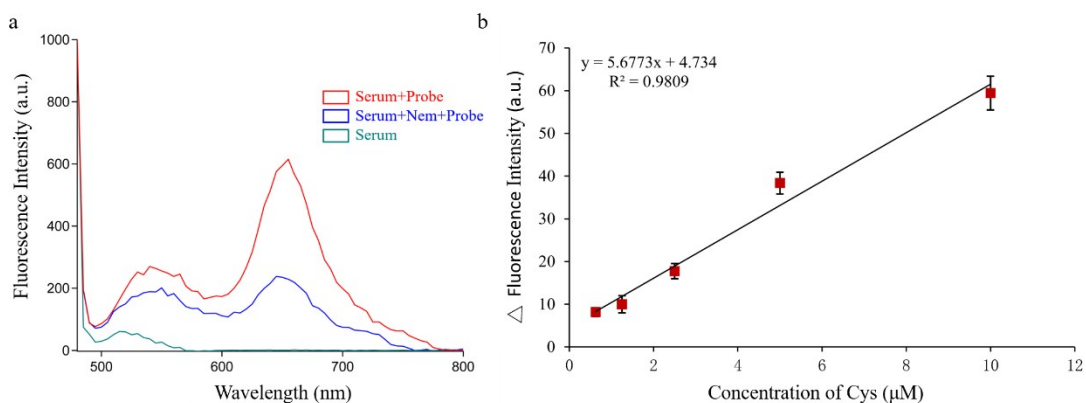

**Figure S8.** (a) Fluorescence intensity of the probe NR-NBD (10  $\mu\text{M}$ ) in DMSO/PBS solution (4: 6, v/v, pH = 7.4) upon addition of various serum samples (2%),  $\lambda_{\text{ex}} = 476$  nm, Slits: 10.0/5.0 nm. (b) Working curves of probe NR-NBD (10  $\mu\text{M}$ ) to Cys in normal serum samples.

Human serum (100  $\mu\text{L}$ ) was deproteinized using Methanol (3 mL) containing 1% acetic acid and centrifuging at 15000 rpm for 10 min. The supernatant was blow-dried and diluted in 5 mL DMSO/PBS solution (4: 6, v/v, pH = 7.4). The Cys contents in the serum sample were determined using the same procedure above and the standard calibration curves.

To build a standard curve, we firstly measured the fluorescence spectra of 2% serum in the absence/presence the probe NR-NBD (10  $\mu\text{M}$ ). As we known, N-ethylmaleimide (NEM) was a specific inhibitor for thiols including Cys. Compared with the group of probe + serum, the fluorescence intensity of probe + serum + NEM at 550 nm was decreased because the Cys was consumed by NEM. Then Cys is quantified by the difference between group probe + serum and group probe + serum + NEM at 550 nm. By plotting the fluorescence intensity versus the concentrations of analytes, a standard curve was obtained, as shown in Fig.S8.

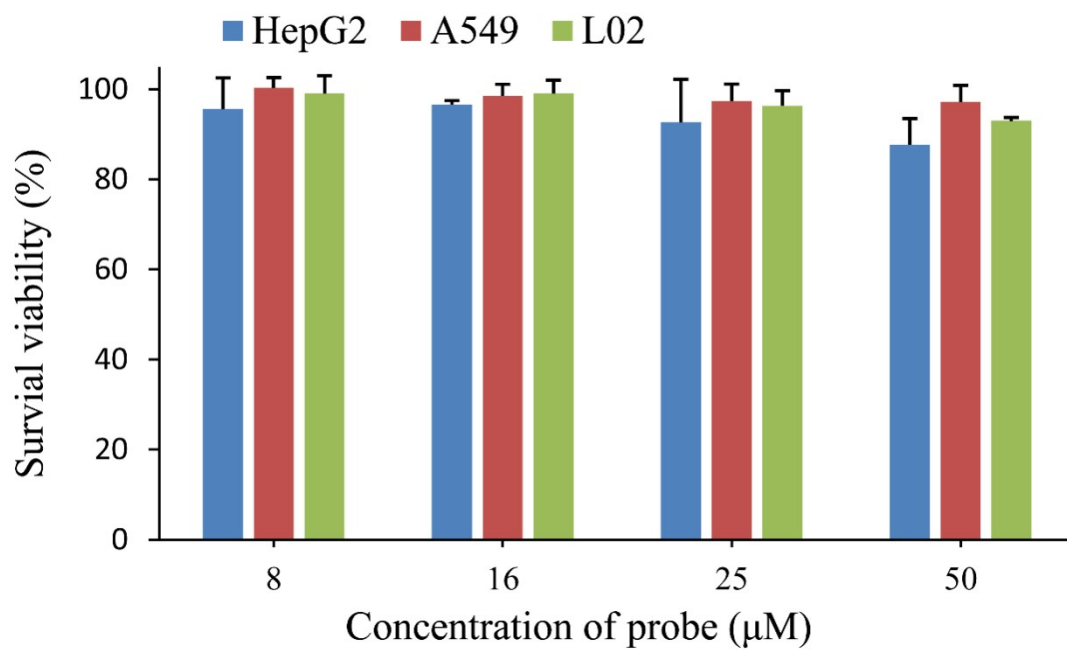

**Figure S9.** CCK8 assay of (a) HepG2, (b) A549, (c) L02 cells incubated in the presence of the probe NR-NBD (0-50 μM) at 37 °C for 24 h.

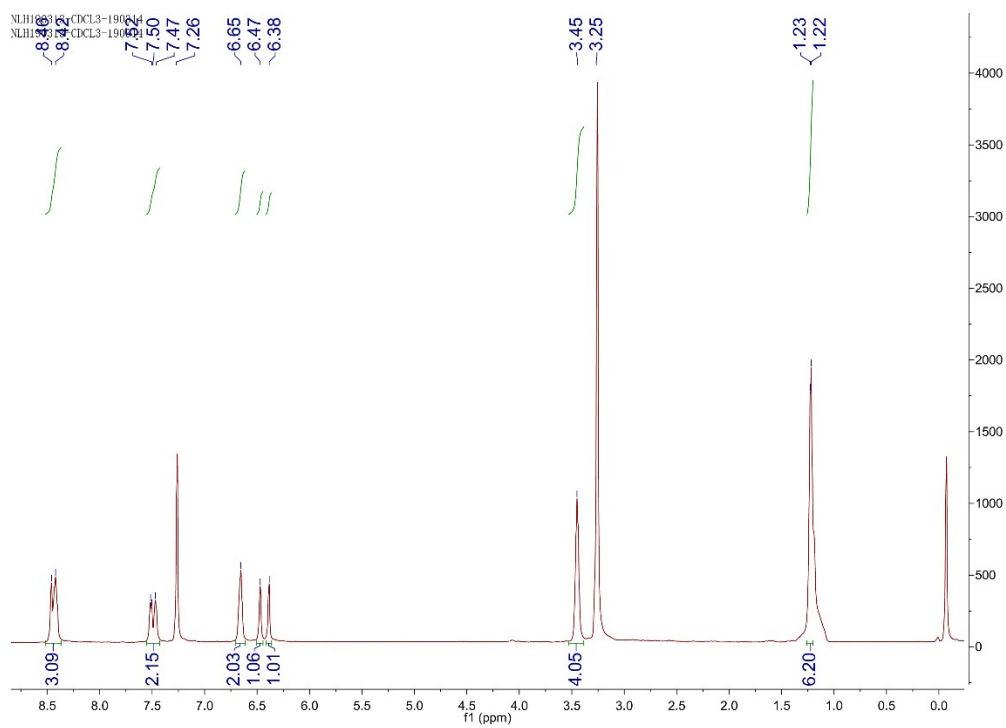

**Figure S10.** <sup>1</sup>H-NMR spectra of the probe NR-NBD in CDCl<sub>3</sub>: MeOD (20:1, v:v).

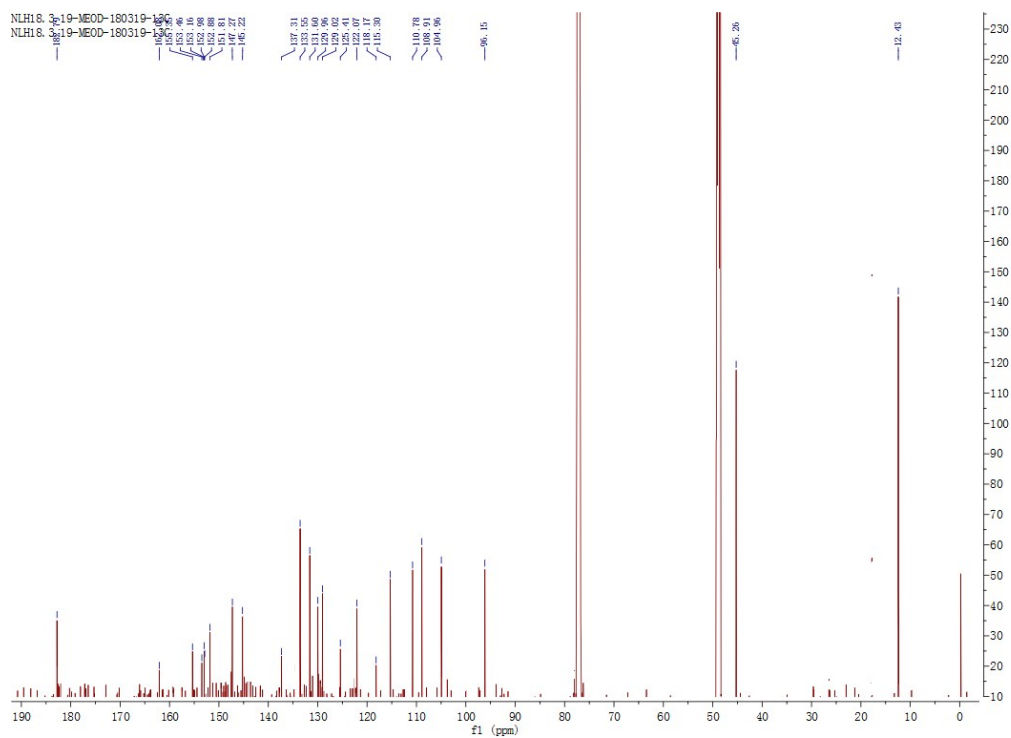

**Figure S11.**  $^{13}\text{C}$ -NMR spectra of the probe NR-NBD in  $\text{CDCl}_3$ : MeOD (1:3, v:v).

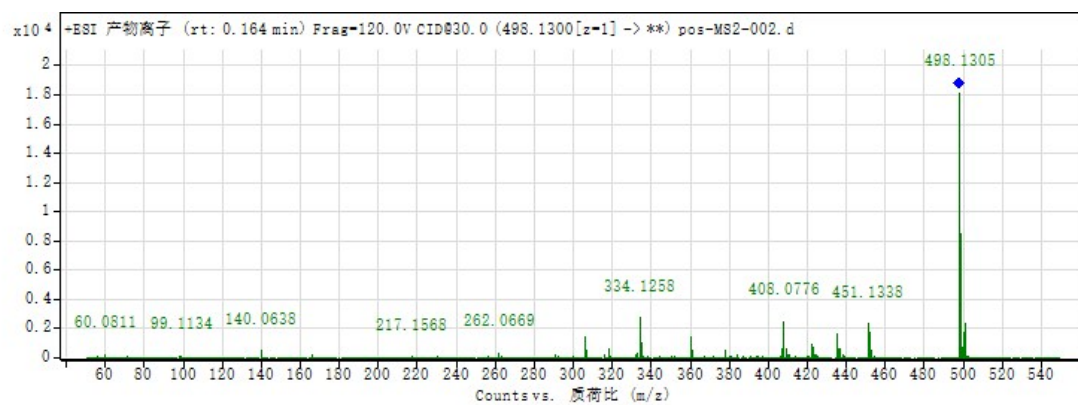

**Figure S12.** HRMS spectrum of probe NR-NBD in MeOH.



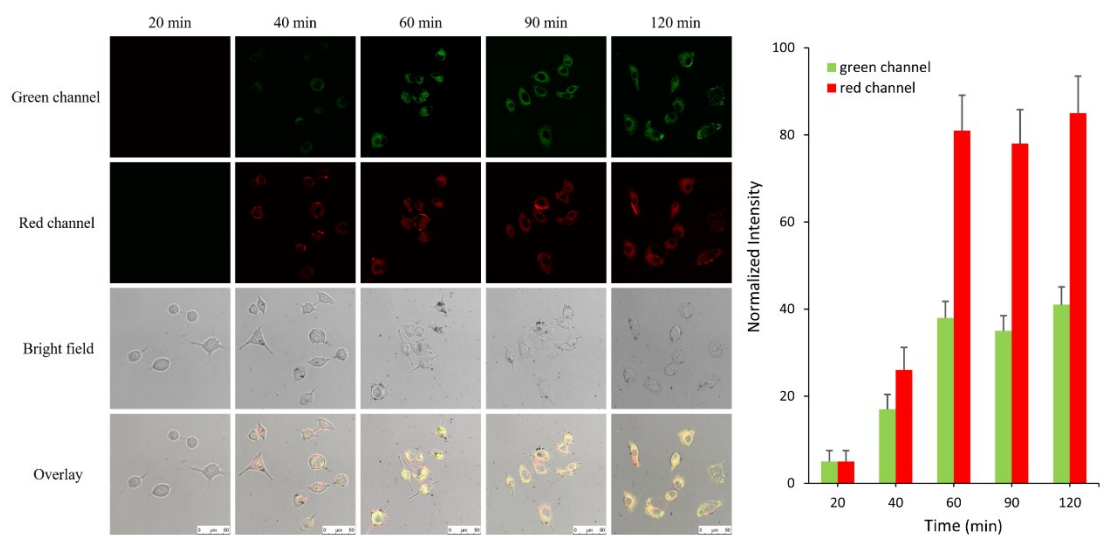

**Figure S13.** The fluorescence intensity of probe NR-NBD (20  $\mu\text{M}$ ) with different incubated time in living cells pretreated with Cys (500  $\mu\text{M}$ ). The cells were incubated with probe NR-NBD (20  $\mu\text{M}$ ) for (a) 20 min. (b) 40 min. (c) 60 min. (d) 90 min. (e) 120 min.

**Table S1. The comparison data with some other fluorescent probes**

| Multisite probe                                                                     | Distinguishing targets for detection | Number of emission bands | Emission wavelength/nm | biological system  | Ref. |
|-------------------------------------------------------------------------------------|--------------------------------------|--------------------------|------------------------|--------------------|------|
| 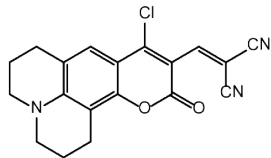   | Cys/Hcy, GSH                         | 2                        | 500, 560               | HeLa cells         | 1    |
|    | Cys/Hcy, GSH                         | 2                        | 545, 621               | HeLa cells         | 2    |
|  | GSH                                  | 1                        | 735                    | HeLa cells         | 3    |
|  | Cys                                  | 2                        | 332, 450               | HepG2 cells        | 4    |
|  | Cys                                  | 1                        | 679                    | HeLa cells         | 5    |
|  | Cys                                  | 1                        | 760                    | HeLa cells<br>Mice | 6    |

|                                                                                     |                                |   |               |                                                      |           |
|-------------------------------------------------------------------------------------|--------------------------------|---|---------------|------------------------------------------------------|-----------|
| 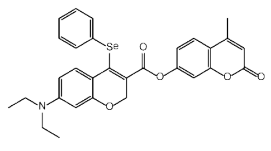   | Cys/Hcy, GSH/H <sub>2</sub> S  | 2 | 465,540       | RAW264.7 cells                                       | 7         |
|    | Cys, GSH                       | 2 | 420, 512      | COS-7 cells                                          | 8         |
|    | Cys/Hcy, GSH                   | 2 | 540/730, 730  | HeLa cells                                           | 9         |
|    | Cys/Hcy, GSH                   | 2 | 550, 716      | HeLa cells, human serum                              | 10        |
|   | H <sub>2</sub> S, Cys/Hcy, GSH | 3 | 485, 546, 609 | HeLa cells                                           | 11        |
|  | H <sub>2</sub> S, Cys/Hcy, GSH | 2 | 550, 650      | HepG2 cells, A549 cells, L02 cells, mice serum, mice | This work |

## Reference

1. Y. Li, W. Liu, P. Zhang, H. Zhang, J. Wu, J. Ge, P. Wang, *Biosens Bioelectron*, 2017, **90**, 117-124.
2. W. Chen, H. Luo, X. Liu, J. W. Foley, X. Song, *Anal Chem*, 2016, **88**, 3638-3646.
3. J. Y. Xie, C. Li, Y. Li, J. Fei, F. Xu, J. Ouyang, J. Liu, *Anal Chem*, 2016, **88**, 9746-9752.
4. Z. H. Fu, X. Han, Y. Shao, J. Fang, Z. Zhang, Y. W. Wang, Y. Peng, *Anal Chem*, 2017, **89**, 1-3.
5. J. Zhang, J. Wang, J. Liu, L. Ning, X. Zhu, B. Yu, X. Liu, X. Yao, H. Zhang, *Anal Chem*, 2015, **87**, 4856-4863.
6. Y. Qi, Y. Huang, B. Li, F. Zeng, S. Wu, *Anal Chem*, 2018, **90**, 1014-1020.
7. W. Chen, X. Yue, Z. Hui, W. Li, L. Zhang, X. Qi, C. Huang, J. Sheng, X. Song, *Anal Chem*, 2017, **89**, 12984-12991.

8. J. Liu, Y. Q. Sun, Y. Huo, H. Zhang, L. Wang, P. Zhang, D. Song, Y. Shi, W. Guo, *J Am Chem Soc*, 2014, **136**, 574-577.
9. H. Xiang, H. Tham, M. Nguyen, S. Fiona Phua, W. Lim, J. Liu, Y. Zhao, *Chem Commun*, 2017, **53**, 5220-5223.
10. Q. Hu, C. Yu, X. Xia, F. Zeng, S. Wu, *Biosens Bioelectron*, 2016, **81**, 341-348.
11. L. He, X. Yang, K. Xu, W. Lin, *Anal Chem*, 2017, **89**, 9567-9573.
